# Supplementary material for: Spontaneous Myocarditis in Mice Predisposed to Autoimmune Disease: Including Vaccination-Induced Onset
Source: Biomedicines. 2022 Jun 18;10(6):1443. doi: 10.3390/biomedicines10061443 (PMC9220133; doi:10.3390/biomedicines10061443)
Supplement: Supplementary file 1 [file biomedicines-10-01443-s001.zip › Table S1.xlsx]

## Sheet: Sheet1
Spplementary Table S1
Records of the date of birth, date of dissection, Myocarditis Score and onset of Insulitis in each genetically modified mouse
ID	Mouse genotype	Sex	age of weeks	dissection date	birth date	Myocarditis Score	Insulitis
1	NOD/NFkB(-/-)-M1	Femal	6w	2020-10-09	2020-08-25	Positive 4	-		Incidence of Myocarditis
2	NOD/NFkB(-/-)-M2	Male	5w	2020-10-09	20208/9/2	Positive 4	-		Male	0.95	19/20
3	NOD/NFkB(-/-)-M3	Femal	6w	2020-10-09	2020-08-25	Positive 4	+		Female	0.75	15/20
4	NOD/NFkB(-/-)-M4	Femal	8w	2020-11-07	2020-09-10	Positive 4	+
5	NOD/NFkB(-/-)-M5	Male	8w	2020-11-07	2020-09-10	Positive 4	+
6	NOD/NFkB(-/-)-M6	Male	4w	2020-11-13	2020-10-18	Positive 4	-
7	NOD/NFkB(-/-)-M7	Femal	7w	2021-01-11	2020-11-23	Negative 0	+
8	NOD/NFkB(-/-)-M8	Male	7w	2021-01-23	2020-12-04	Positive 4	+
9	NOD/NFkB(-/-)-M9	Male	7w	2021-01-30	2020-12-10	Positive 4	-
10	NOD/NFkB(-/-)-M10	Femal	6w	2021-01-29	2020-12-16	Positive 4	+
11	NOD/NFkB(-/-)-M11	Femal	6w	2020-10-09	2020-08-25	Positive 4	-
12	NOD/NFkB(-/-)-M12	Femal	5w	2020-10-09	2020-09-02	Negative 0	+
13	NOD/NFkB(-/-)-M13	Femal	6w	2020-10-09	2020-08-25	Positive 4	+
14	NOD/NFkB(-/-)-M14	Femal	8w	2020-11-07	2020-09-10	Positive 4	+
15	NOD/NFkB(-/-)-M15	Male	8w	2020-11-07	2020-09-10	Positive 4	+
16	NOD/NFkB(-/-)-M16	Male	4w	2020-11-13	2020-10-18	Negative 0	-
17	NOD/NFkB(-/-)-M17	Femal	7w	2021-01-11	2020-11-23	Positive 4	+
18	NOD/NFkB(-/-)-M18	Male	7w	2020-01-23	2020-12-04	Positive 4	-
19	NOD/NFkB(-/-)-M19	Male	7w	2021-01-30	2020-12-10	Positive 4	+
20	NOD/NFkB(-/-)-M20	Femal	6w	2021-01-29	2020-12-16	Positive 4	-
21	NOD/NFkB(-/-)-M21	Femal	6w	2020-10-09	2020-08-25	Positive 4	-
22	NOD/NFkB(-/-)-M22	Male	5w	2020-10-09	2020-09-02	Positive 4	+
23	NOD/NFkB(-/-)-M23	Femal	6w	2020-10-09	2020-08-25	Negative 0	+
24	NOD/NFkB(-/-)-M24	Femal	8w	2020-11-07	2020-09-10	Positive 4	+
25	NOD/NFkB(-/-)-M25	Male	8w	2020-11-07	2020-09-10	Positive 4	+
26	NOD/NFkB(-/-)-M26	Male	4w	2020-11-13	2020-10-18	Positive 4	-
27	NOD/NFkB(-/-)-M27	Femal	7w	2021-01-11	2020-11-23	Positive 4	+
28	NOD/NFkB(-/-)-M28	Male	7w	2021-01-23	2020-12-04	Positive 4	-
29	NOD/NFkB(-/-)-M29	Male	7w	2021-01-30	2020-12-10	Positive 4	-
30	NOD/NFkB(-/-)-M30	Femal	6w	2021-01-29	2020-12-16	Positive 4	-
31	NOD/NFkB(-/-)-M31	Femal	6w	2020-10-09	2020-08-25	Negative 0	-
32	NOD/NFkB(-/-)-M32	Male	5w	2020-10-09	2020-09-02	Positive 4	+
33	NOD/NFkB(-/-)-M33	Femal	6w	2020-10-09	2020-08-25	Positive 4	+
34	NOD/NFkB(-/-)-M34	Femal	8w	2020-11-07	2020-09-10	Negative 0	+
35	NOD/NFkB(-/-)-M35	Male	8w	2020-11-07	2020-09-10	Positive 4	+
36	NOD/NFkB(-/-)-M36	Male	4w	2020-11-13	2020-10-18	Positive 4	-
37	NOD/NFkB(-/-)-M37	Femal	7w	2021-01-11	2020-11-23	Positive 4	+
38	NOD/NFkB(-/-)-M38	Male	7w	2021-01-23	2020-12-04	Positive 4	-
39	NOD/NFkB(-/-)-M39	Male	7w	2021-01-30	2020-12-10	Positive 4	-
40	NOD/NFkB(-/-)-M40	Femal	6w	2021-01-29	2020-12-16	Positive 4	-
ID	Mouse genotype	Sex	age of months	dissection date	birth date	Myocarditis Score	Insulitis
41	NOD/NFkB(-/+)-C1	Female	8m	2020-11-23	2020-03-02	Negative 0	+		Incidence of Myocarditis
42	NOD/NFkB(-/+)-C2	Female	8m	2020-11-26	2020-03-02	Negative 0	+/-		(NOD/NFkB(-/+))
43	NOD/NFkB(-/+)-C3	Male	8m	2020-11-26	2020-03-02	Negative 0	+		Male	0.15	3/20
44	NOD/NFkB(-/+)-C4	Male	8m	2020-11-26	2020-03-02	Negative 0	+		Female	0.05	1/20
45	NOD/NFkB wt-C5	Female	10m	2020-11-26	2020-01-28	Negative 0	+
46	NOD/NFkB(-/+)-C6	Female	9.5m	2021-10-28	2020-09-10	Negative 0	+
47	NOD/NFkB(-/+)-C7	Male	8m	2021-04-19	2020-08-18	Negative 0	+/-		Incidence of Myocarditis
48	NOD/NFkB(-/+)-C8	Female	9m	2021-03-02	2008-06-18	Negative 0	+		(NOD/NFkB wt)
49	NOD/NFkB(-/+)-C9	Male	8m	2020-11-23	2020-03-02	Negative 0	+		Male	0	0/3
50	NOD/NFkB(-/+)-C10	Female	8m	2020-11-26	2020-03-02	Negative 0	+/-		Female	0	0/2
51	NOD/NFkB(-/+)-C11	Male	8m	2020-11-26	2020-03-02	Negative 0	+
52	NOD/NFkB(-/+)-C12	Male	8m	2020-11-26	2020-03-02	Negative 0	+
53	NOD/NFkB wt-C13	Male	10m	2020-11-26	2020-01-28	Negative 0	+/-
54	NOD/NFkB(-/+)-C14	Female	9.5m	2021-06-28	2020-09-10	Negative 0	+
55	NOD/NFkB(-/+)-C15	Male	8m	2021-04-19	2020-08-18	Negative 0	+/-
56	NOD/NFkB(-/+)-C16	Male	9m	2021-03-02	2020-06-18	+/- 1	+
57	NOD/NFkB(-/+)-C17	Female	8m	2020-11-23	2020-03-02	Negative 0	+
58	NOD/NFkB(-/+)-C18	Female	8m	2020-11-26	2020-03-02	Negative 0	+/-
59	NOD/NFkB(-/+)-C19	Female	8m	2020-11-26	2020-03-02	Negative 0	+
60	NOD/NFkB(-/+)-C20	Male	8m	2020-11-26	2020-03-02	Negative 0	+
61	NOD/NFkB wt-C21	Male	10m	2020-11-26	2020-01-28	Negative 0	+/-
62	NOD/NFkB(-/+)-C22	Male	9.5m	2021-06-28	2020-09-10	Negative 0	+
63	NOD/NFkB(-/+)-C23	Female	8m	2021-04-19	2020-08-18	Negative 0	+
64	NOD/NFkB(-/+)-C24	Male	9m	2021-03-02	2020-06-18	Negative 0	+
65	NOD/NFkB(-/+)-C25	Female	8m	2020-11-23	2020-03-02	Negative 0	+
66	NOD/NFkB(-/+)-C26	Female	8m	2020-11-26	2020-03-02	Negative 0	+/-
67	NOD/NFkB(-/+)-C27	Male	8m	2020-11-26	2020-03-02	+/- 1	+
68	NOD/NFkB(-/+)-C28	Male	8m	2020-11-26	2020-03-02	Negative 0	+
69	NOD/NFkB wt-C29	Female	10m	2020-11-26	2020-01-28	Negative 0	+/-
70	NOD/NFkB(-/+)-C30	Female	9.5m	2021-06-28	2020-09-10	Negative 0	+
71	NOD/NFkB(-/+)-C31	Female	8m	2021-04-19	2020-06-18	Negative 0	+/-
72	NOD/NFkB(-/+)-C32	Male	9m	2021-03-02	2020-06-18	+/- 1	+
73	NOD/NFkB(-/+)-C33	Female	8m	2020-11-23	2020-03-02	Negative 0	+
74	NOD/NFkB(-/+)-C34	Female	8m	2020-11-26	2020-03-02	Negative 0	+/-
75	NOD/NFkB(-/+)-C35	Male	8m	2020-11-26	2020-03-02	Negative 0	+
76	NOD/NFkB(-/+)-C36	Male	8m	2020-11-26	2020-03-02	Negative 0	+
77	NOD/NFkB wt-C37	Male	10m	2020-11-26	2020-01-28	Negative 0	+/-
78	NOD/NFkB(-/+)-C38	Female	9.5m	2021-06-28	2020-09-10	Negative 0	+
79	NOD/NFkB(-/+)-C39	Female	8m	2021-04-19	2020-08-18	Negative 0	+/-
80	NOD/NFkB(-/+)-C40	Male	9m	2021-03-02	2020-06-18	Negative 0	+
81	NOD/NFkB(-/+)-C41	Female	8m	2021-04-19	2020-08-18	Negative 0	+/-
82	NOD/NFkB(-/+)-C42	Male	8m	2020-11-26	2020-03-02	Negative 0	+/-
83	NOD/NFkB(-/+)-C43	Female	10m	2020-11-26	2020-01-28	Negative 0	+
84	NOD/NFkB(-/+)-C44	Male	9m	2020-12-23	2020-03-02	+/- 1	+
85	NOD/NFkB(-/+)-C45	Male	9m	2020-12-23	2020-03-02	Negative 0	+/-
